# Supplementary material for: Epithelial–Mesenchymal Transition in Endometriosis—When Does It Happen?
Source: PubMed Central journal article supplement (PMC7357060; doi:10.3390/jcm9061915), 2020-06-18
Supplement: jcm-09-01915-s001.pdf [file jcm-09-01915-s001.pdf]

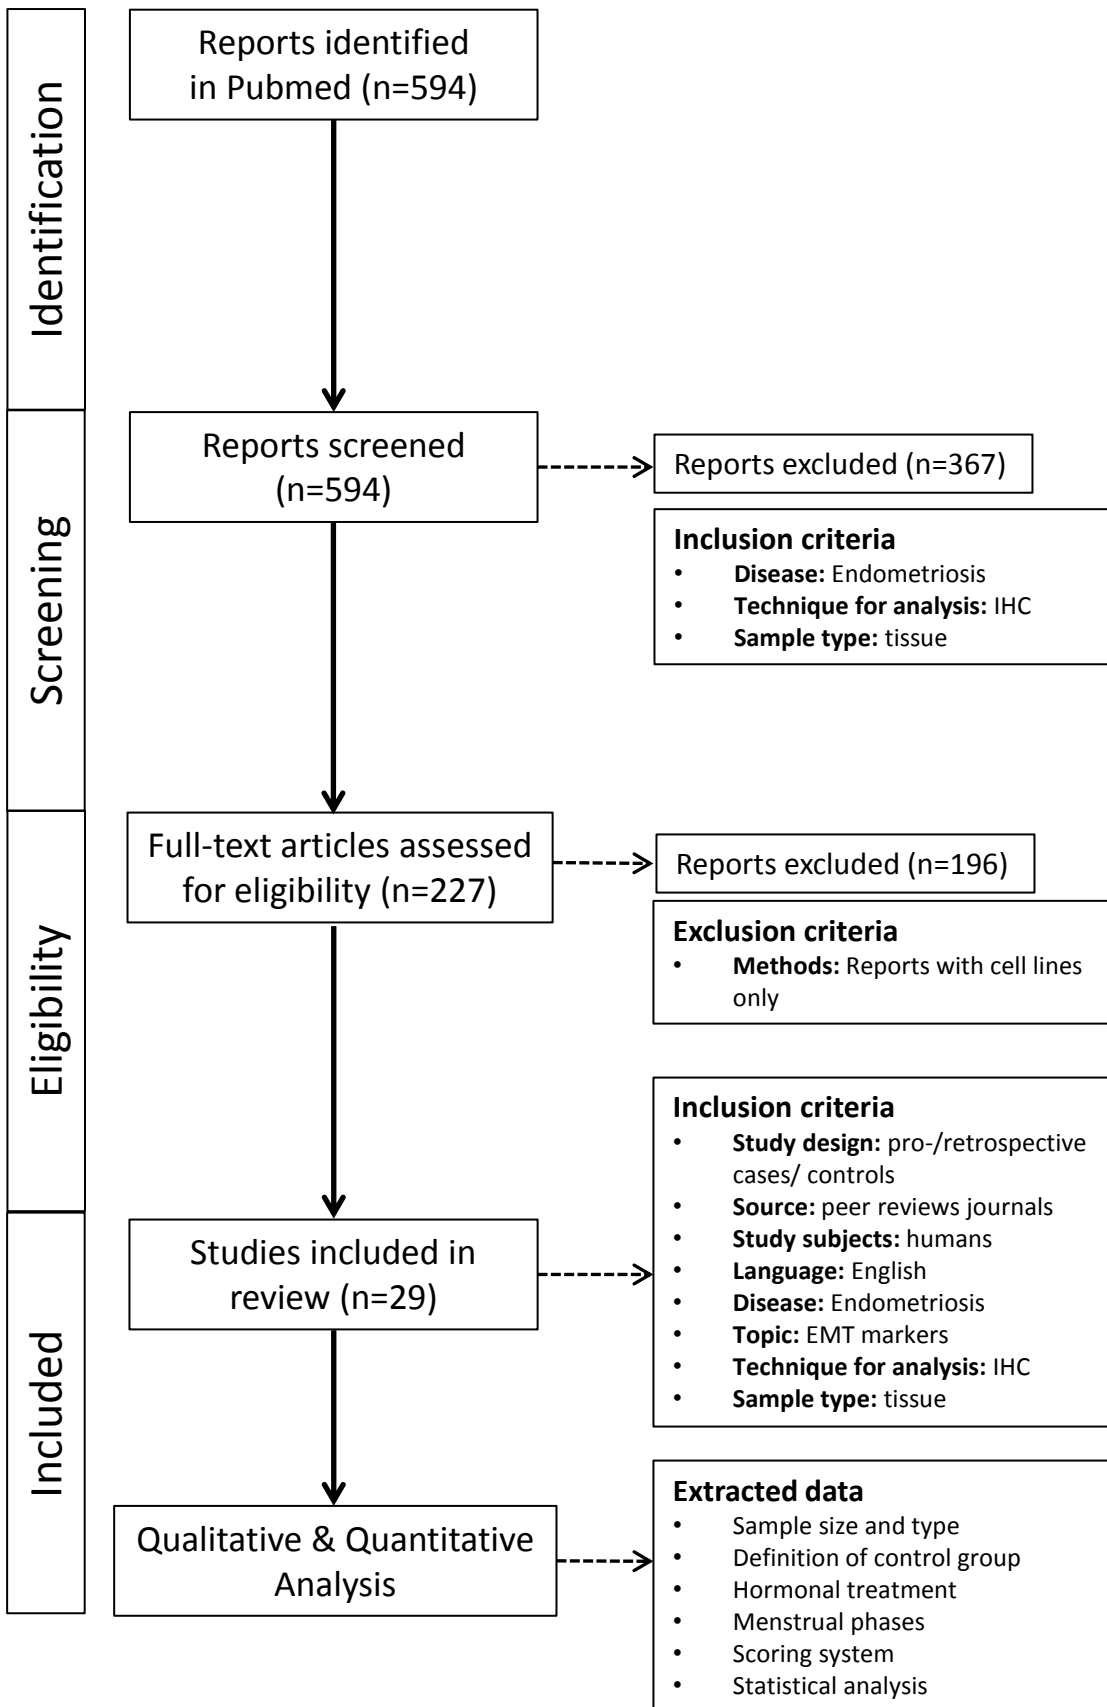

Figure S1
